# Supplementary material for: Face Recognition by Metropolitan Police Super-Recognisers
Source: PLoS One. 2016 Feb 26;11(2):e0150036. doi: 10.1371/journal.pone.0150036 (PMC4769018; doi:10.1371/journal.pone.0150036)
Supplement: S1 Table — (XLSX) [file pone.0150036.s001.xlsx]

## Sheet: GFMT
ID	Accuracy%
SR1	100
08LM	100
152AM	100
SR3	98
03EL	97.5
170CR	97.5
SR4	95
01JR	95
02SG	95
12MVN	95
21FC	95
51SM	95
53JC	95
68GS	95
108CR	95
111KS	95
131DJ	95
137SD	95
171CP	95
193JC	95
07VS	92.5
14SM	92.5
26DM	92.5
34RW	92.5
56HM	92.5
75MM	92.5
89JH	92.5
101PM	92.5
102NB	92.5
140LM	92.5
149SL	92.5
167KT	92.5
187CT	92.5
SR2	90
09SS	90
27KD	90
32BO	90
36DW	90
70AM	90
72RF	90
113TK	90
139SH	90
145NK	90
151MG	90
157SB	90
176TS	90
10PH	87.5
15DR	87.5
18DB	87.5
19LH	87.5
33GS	87.5
47CB	87.5
48MD	87.5
49LC	87.5
50MP	87.5
59CD	87.5
60CT	87.5
66AP	87.5
69JH	87.5
77LM	87.5
83SS	87.5
84AM	87.5
87PB	87.5
92LF	87.5
93JS	87.5
122JD	87.5
124HM	87.5
134AM	87.5
166PF	87.5
173SM	87.5
183WD	87.5
04SM	85
13KH	85
17PC	85
29JN	85
35VM	85
37SH	85
41CD	85
42EJ	85
71LD	85
76SM	85
88AS	85
100RB	85
118NP	85
144WP	85
146SP	85
159NM	85
184GM	85
06AS	82.5
23DM	82.5
24GL	82.5
28KM	82.5
31DT	82.5
39MS	82.5
43LR	82.5
45CW	82.5
73SA	82.5
86DF	82.5
91CA	82.5
98AR	82.5
123AB	82.5
143DR	82.5
148PW	82.5
154SM	82.5
156SF	82.5
165DL	82.5
185SS	82.5
191LJ	82.5
192JH	82.5
194FR	82.5
11JH	80
30GM	80
58SR	80
79JB	80
80SS	80
82IH	80
90NAF	80
99CS	80
112JS	80
116KM	80
117RT	80
136HB	80
150AM	80
153CJ	80
160LM	80
179EM	80
20CG	77.5
40AG	77.5
44SN	77.5
81SL	77.5
94KM	77.5
95RS	77.5
105GN	77.5
110MT	77.5
126KM	77.5
128JL	77.5
141CR	77.5
142NC	77.5
158NL	77.5
164DH	77.5
169ML	77.5
178MM	77.5
180SS	77.5
182RB	77.5
52GW	75
97DP	75
125LJ	75
127RN	75
138KE	75
161AB	75
168DW	75
189DM	75
38DM	72.5
62RM	72.5
63CS	72.5
74KH	72.5
78SC	72.5
103KS	72.5
109JS	72.5
174NS	72.5
175SH	72.5
190AG	72.5
67CM	71
05JR	70
25GS	70
55JA	70
57JS	70
64AB	70
85GD	70
96NM	70
104GS	70
106CF	70
107SM	70
114AM	70
121AM	70
130AM	70
135ML	70
177GS	70
186RD	70
61CG	69
133SR	69
54WW	67.5
65MT	67.5
129CL	67.5
162MM	67.5
163YS	67.5
46GF	65
155LB	65
172CA	65
16AW	62.5
22ST	62.5
115DS	62.5
188JM	62.5
120JC	60
132KL	60
181DA	60
119JD	55
147GM	52.5

## Sheet: MFMT
ID	Accuracy%
	100
	93.3333
	93.3333
SR3	93
SR4	90
SR1	89
SR2	89
	86.6667
	86.6667
	86.6667
	86.6667
	83.3333
	83.3333
	83.3333
	83.3333
	83.3333
	83.3333
	83.3333
	83.3333
	83.3333
	80
	80
	76.6667
	76.6667
	76.6667
	76.6667
	76.6667
	76.6667
	73.3333
	73.3333
	73.3333
	73.3333
	73.3333
	73.3333
	70
	70
	70
	70
	70
	70
	70
	66.6667
	66.6667
	66.6667
	66.6667
	63.3333
	63.3333
	63.3333
	63.3333
	63.3333
	63.3333
	63.3333
	63.3333
	63.3333
	56.6667
	50
	50
	50
	73.2963
	10.2809

## Sheet: PLT
ID	Accuracy%(8–10)
P23	100
SR4	100
SR2	92.8571
SR1	91.0714
P16	90.9091
P9	90
P15	90
SR3	88.4615
P11	87.5
P24	87.5
P7	86.6667
P19	84.6154
P18	83.3333
P22	83.3333
P28	83.3333
P30	83.3333
P8	82.3529
P20	81.25
P21	80
P25	77.7778
P1	75
P3	75
P4	75
P5	75
P13	75
P10	73.3333
P14	73.0769
P29	70.8333
P2	70
P6	70
P27	61.5385
P12	60
P26	40
P17	25
	Overall Accuracy%
SR1	91.6667
SR2	91.6667
P21	90
P18	88.1944
P23	87.5
SR3	85
P7	82.971
P24	81.7857
P15	80.5
P9	78.6667
P8	76.5251
P20	75.7738
P12	75.125
P22	74.9524
P19	73.0342
P29	72.7083
P25	70.0397
SR4	70
P10	69.2708
P1	68.9394
P16	65.6119
P28	65.3571
P13	65
P30	64.5833
P11	64.375
P5	64.0385
P14	62.9487
P17	57.9167
P27	57.0513
P3	50.8333
P4	50.8333
P26	50.1538
P2	50
P6	50
